# Supplementary material
Source: PubMed Central journal article supplement (PMC5857960)
Supplement: NIHMS920874-supplement-supplement_1.pdf [file NIHMS920874-supplement-supplement_1.pdf]

Supplemental Table

**Table 1 supplemental. Adverse Events**

| ADVERSE EVENTS                      | Abiraterone Acetate<br>(n=40)<br>Grade |           |           |           |          |          |
|-------------------------------------|----------------------------------------|-----------|-----------|-----------|----------|----------|
|                                     | 0                                      | 1         | 2         | 3         | 4        | 5        |
| ALT increased                       | 32                                     | 4         | 2         | 1         | 1        | 0        |
| AST increased                       | 31                                     | 7         | 0         | 2         | 0        | 0        |
| Anorexia                            | 38                                     | 1         | 0         | 1         | 0        | 0        |
| Hyperglycemia                       | 30                                     | 8         | 0         | 2         | 0        | 0        |
| Hypertension                        | 30                                     | 2         | 6         | 2         | 0        | 0        |
| Hypokalemia                         | 36                                     | 2         | 0         | 2         | 0        | 0        |
| INR increased                       | 39                                     | 0         | 0         | 1         | 0        | 0        |
| Leukocytosis                        | 39                                     | 0         | 0         | 1         | 0        | 0        |
| Lung infection                      | 38                                     | 0         | 1         | 1         | 0        | 0        |
| Nausea                              | 35                                     | 3         | 0         | 2         | 0        | 0        |
| Rectal hemorrhage                   | 39                                     | 0         | 0         | 0         | 1        | 0        |
| Thromboembolic event                | 39                                     | 0         | 0         | 1         | 0        | 0        |
| Vomiting                            | 38                                     | 0         | 0         | 2         | 0        | 0        |
| Weight gain                         | 37                                     | 2         | 0         | 1         | 0        | 0        |
| <b>MAX. GRADE ANY ADVERSE EVENT</b> | <b>3</b>                               | <b>11</b> | <b>13</b> | <b>11</b> | <b>2</b> | <b>0</b> |

Abbreviations: ALT, alanine aminotransferase; AST, aspartate aminotransferase; INR, international normalized ratio
